# Supplementary material for: Two Novel Genera, Neostemphylium and Scleromyces (Pleosporaceae) from Freshwater Sediments and Their Global Biogeography
Source: MDPI journal article supplement (doi:10.3390/jof8080868), 2022-08-17
Supplement: s1 [file s1]

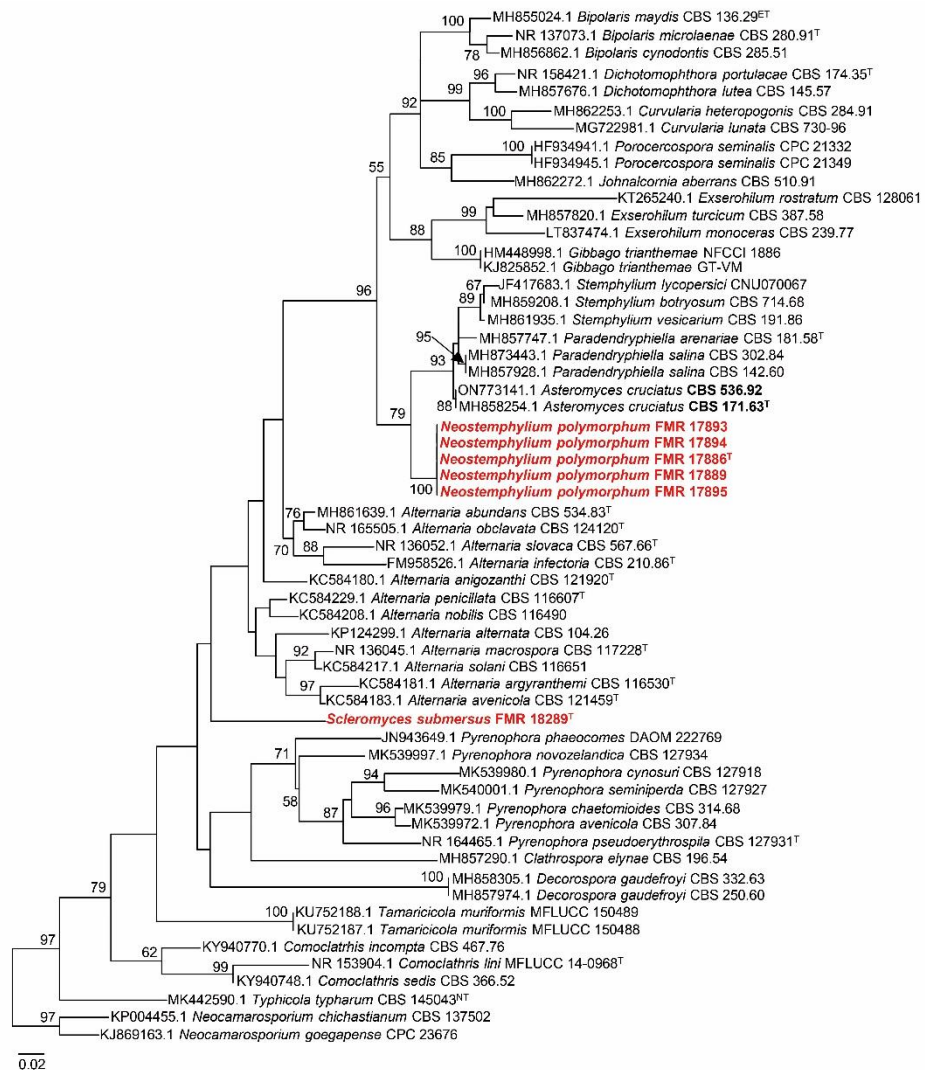

**Figure S1.** RAxML tree of the *Pleosporaceae* family from ITS including the strains recovered from freshwater sediments studied in this work. The strains studied in this work are in bold and in red. Determined by MEGA software v.6, the best nucleotide substitution model for ML analysis was K2+G+I. The aligned data set was 531 bp long, with 217 variable sites and 198 phylogenetically informative. Branch lengths are proportional to phylogenetic distance. Bootstrap support values above 50% are indicated on the nodes. The tree is rooted to *Neocamarosporium chichastianum* CBS 137502 and *Neocamarosporium goegapense* CPC 23676. <sup>T</sup>= Ex-type strain.

**Table S1.** Environmental and biogeographical information contained in all ITS1/ITS2 sequences downloaded from the GlobalFungi database included in our analysis (see Figure 2).

| Hypothetical Taxa                 | Sequence                          | ITS <sup>1</sup> | Sample ID <sup>2</sup> | Primers         | Longitude | Latitude | Sample Type      | ITS Observed <sup>3</sup> | ITS Total <sup>4</sup> | Freq. R <sup>5</sup> | Biome     | MAT <sup>6</sup> | MAP <sup>7</sup> | pH   | Geographical Origin | Dominant Plants                 |
|-----------------------------------|-----------------------------------|------------------|------------------------|-----------------|-----------|----------|------------------|---------------------------|------------------------|----------------------|-----------|------------------|------------------|------|---------------------|---------------------------------|
| <i>Alternaria avenicola</i>       | 398ac0e08465fe47f2af7374ad912c26  | ITS1             | 2454                   | ITS1ngs/ITS4ngs | 22.1828   | 58.1061  | Soil             | 1                         | 2643                   | 0.0378               | Grassland | 7.1              | 566              | NA   | Estonia             |                                 |
| <i>Alternaria avenicola</i>       | 40197eb26ec13e85f78292bafb0faa7f  | ITS1             | 12856                  | ITS1ngs/ITS4ngs | 21.972    | 58.451   | Soil             | 1                         | 2968                   | 0.0337               | Grassland | 7.0              | 591              | NA   | Estonia             | <i>Platanthera chlorantha</i>   |
| <i>Alternaria avenicola</i>       | b728a7b942d7518ea9b3b8b82cda9821  | ITS1             | 8244                   | ITS1F/ITS4      | -4.25     | 42.81    | Root             | 4                         | 38391                  | 0.0104               | Grassland | 10.2             | NA               | 6.61 | Spain               | <i>Microthlaspi perfoliatum</i> |
| <i>Alternaria avenicola</i>       | d52110c7fa2698f97ce9c594036a7a59  | ITS1             | 8244                   | ITS1F/ITS4      | -4.25     | 42.81    | Root             | 2                         | 38391                  | 0.0052               | Grassland | 10.2             | NA               | 6.61 | Spain               | <i>Microthlaspi perfoliatum</i> |
| <i>Alternaria avenicola</i>       | d5e3b017e0f32f46e5f2778179f4fb6e  | ITS1             | 252                    | ITS1F/ITS4      | 110.527   | -66.282  | Soil             | 2                         | 209763                 | 0.0010               | Desert    | NA               | NA               | 5.91 | Antarctica          |                                 |
| <i>Neostemphylium polymorphum</i> | 005722a617645f9fee72b3bef5fb6873  | ITS1             | 4773                   | ITS1F/ITS4      | 147.614   | -42.794  | Soil             | 2                         | 156717                 | 0.01                 | Grassland | 10.9             | 615              | 5.6  | Australia           |                                 |
| <i>Neostemphylium polymorphum</i> | 0a38b3f7b73520b84914b2928c26a46e  | ITS1             | 4773                   | ITS1F/ITS4      | 147.614   | -42.794  | Soil             | 1                         | 156717                 | 0.006                | Grassland | 10.9             | 615              | 5.5  | Australia           |                                 |
| <i>Neostemphylium polymorphum</i> | 2d0b551038667839eb5e0ba20c0b20ef  | ITS1             | 4773                   | ITS1F/ITS4      | 147.614   | -42.794  | Soil             | 2                         | 156717                 | 0.012                | Grassland | 10.9             | 615              | 5.5  | Australia           |                                 |
| <i>Neostemphylium polymorphum</i> | 32738b33d0714aac20ab9ab19f3071d8  | ITS1             | 4773                   | ITS1F/ITS4      | 147.614   | -42.794  | Soil             | 3                         | 156717                 | 0.019                | Grassland | 10.9             | 615              | 5.5  | Australia           |                                 |
| <i>Neostemphylium polymorphum</i> | 3dfb7d5b5c53b75fcc9bc8ac595aa225  | ITS1             | 4773                   | ITS1F/ITS4      | 147.614   | -42.794  | Soil             | 2                         | 156717                 | 0.012                | Grassland | 10.9             | 615              | 5.5  | Australia           |                                 |
| <i>Neostemphylium polymorphum</i> | 432c6ddc5a573f2d5bb0adc44a79a377  | ITS1             | 4773                   | ITS1F/ITS4      | 147.614   | -42.794  | Soil             | 1                         | 156717                 | 0.003                | Grassland | 10.9             | 615              | 5.5  | Australia           |                                 |
| <i>Neostemphylium polymorphum</i> | 4dd9ffac7a16f1444a2e543471fc3006  | ITS1             | 4773                   | ITS1F/ITS4      | 147.614   | -42.794  | Soil             | 164                       | 156717                 | 0.104                | Grassland | 10.9             | 615              | 5.5  | Australia           |                                 |
| <i>Neostemphylium polymorphum</i> | 5666fb2cc1fa5ebed97dfce7d0175259  | ITS1             | 1638                   | ITS1F/ITS4      | 147.614   | -42.794  | Soil             | 28                        | 122142                 | 0.229                | Grassland | 10.9             | 615              | 5.6  | Australia           |                                 |
| <i>Neostemphylium polymorphum</i> | 567b99d492e0a9cf157762b3520b2012  | ITS1             | 6768                   | ITS1F/ITS4      | -117.179  | 46.785   | Soil             | 3                         | 7889                   | 0.380                | Cropland  | 9.3              | 536              | 5.6  | USA                 | <i>Triticum aestivum</i>        |
| <i>Neostemphylium polymorphum</i> | 5dd8920f75870263f9575b604d2ae8a3  | ITS1             | 8233                   | ITS3_KYO2/ITS4  | -2.77389  | 42.541   | Rhizosphere soil | 4                         | 89998                  | 0.044                | Cropland  | 13               | 626              | 8.2  | Spain               | <i>Vitis vinifera</i>           |
| <i>Neostemphylium polymorphum</i> | 7a89eddaabaa774d3ea09513e72b7acf9 | ITS1             | 1638                   | ITS1F/ITS4      | 147.614   | -42.794  | Soil             | 1                         | 122142                 | 0.0081               | Grassland | 10.9             | 615              | 5.6  | Australia           |                                 |
| <i>Neostemphylium polymorphum</i> | 98148edf126d072bd6fdeb00e2ad6eb   | ITS1             | 4773                   | ITS1F/ITS4      | 147.614   | -42.794  | Soil             | 2                         | 156717                 | 0.012                | Grassland | 10.9             | 615              | 5.5  | Australia           |                                 |
| <i>Neostemphylium polymorphum</i> | a7682143810c8e8673cda2abf1d2f9dc  | ITS1             | 4773                   | ITS1F/ITS4      | 147.614   | -42.794  | Soil             | 121                       | 156717                 | 0.77                 | Grassland | 10.9             | 615              | 5.5  | Australia           |                                 |

|                                     |                                  |      |       |            |          |         |       |     |        |        |           |      |      |     |            |                                |
|-------------------------------------|----------------------------------|------|-------|------------|----------|---------|-------|-----|--------|--------|-----------|------|------|-----|------------|--------------------------------|
| <i>Neostemphylium polymorphum</i>   | b772018cda8df28137a048d4e2c49c5f | ITS1 | 1638  | ITS1F/ITS4 | 147.614  | -42.794 | Soil  | 1   | 122142 | 0.0081 | Grassland | 10.9 | 615  | 5.6 | Australia  |                                |
| <i>Neostemphylium polymorphum</i>   | bf84e5d488b9b365d4d3565cd263726b | ITS1 | 4773  | ITS1F/ITS4 | 147.614  | -42.794 | Soil  | 4   | 156717 | 0.025  | Grassland | 10.9 | 615  | 5.5 | Australia  |                                |
| <i>Neostemphylium polymorphum</i>   | c09ecbc23cf5699e459aa7592c3bf50f | ITS1 | 4773  | ITS1F/ITS4 | 147.614  | -42.794 | Soil  | 2   | 156717 | 0.012  | Grassland | 10.9 | 615  | 5.5 | Australia  |                                |
| <i>Neostemphylium polymorphum</i>   | c3188249cad06c49b99df58c645b4192 | ITS1 | 1638  | ITS1F/ITS4 | 147.614  | -42.794 | Soil  | 1   | 122142 | 0.008  | Grassland | 10.9 | 615  | 5.6 | Australia  |                                |
| <i>Neostemphylium polymorphum</i>   | c428603cddb061ed5d5f0eba7b64d561 | ITS1 | 1638  | ITS1F/ITS4 | 147.614  | -42.794 | Soil  | 1   | 122142 | 0.008  | Grassland | 10.9 | 615  | 5.6 | Australia  |                                |
| <i>Neostemphylium polymorphum</i>   | ccb6952f6a039cb0d798c3393fcdffdf | ITS1 | 16091 | ITS1F/ITS2 | -123.000 | 43.93   | Root  | 48  | 48773  | 0.984  | Wetland   | 12.4 | 1029 | 5.9 | USA        | <i>Camassia quamash</i>        |
| <i>Neostemphylium polymorphum</i>   | d3d82840d91aaa96410995dd98137cce | ITS1 | 4773  | ITS1F/ITS4 | 147.614  | -42.794 | Soil  | 2   | 156717 | 0.012  | Grassland | 10.9 | 615  | 5.5 | Australia  |                                |
| <i>Neostemphylium polymorphum</i>   | d6138ce3588d37ae8e12eae65f2c3ae  | ITS1 | 4773  | ITS1F/ITS4 | 147.614  | -42.794 | Soil  | 2   | 156717 | 0.012  | Grassland | 10.9 | 615  | 5.5 | Australia  |                                |
| <i>Neostemphylium polymorphum</i>   | dbeeb6cf718c5ee470f0266ec74203b2 | ITS1 | 4773  | ITS1F/ITS4 | 147.614  | -42.794 | Soil  | 2   | 156717 | 0.012  | Grassland | 10.9 | 615  | 5.5 | Australia  |                                |
| <i>Neostemphylium polymorphum</i>   | ede3c861bbc52b33af809182642dc525 | ITS1 | 4773  | ITS1F/ITS4 | 147.614  | -42.794 | Soil  | 3   | 156717 | 0.019  | Grassland | 10.9 | 615  | 5.5 | Australia  |                                |
| <i>Neostemphylium polymorphum</i>   | f0cf55b2f85219853e589577d8edacef | ITS1 | 1638  | ITS1F/ITS4 | 147.614  | -42.794 | Soil  | 1   | 122142 | 0.008  | Grassland | 10.9 | 615  | 5.6 | Australia  |                                |
| <i>Neostemphylium polymorphum</i>   | f935ebc9a26ad00f9d988404c41a2b0e | ITS1 | 4773  | ITS1F/ITS4 | 147.614  | -42.794 | Soil  | 5   | 156717 | 0.031  | Grassland | 10.9 | 615  | 5.5 | Australia  |                                |
| <i>Neostemphylium polymorphum</i>   | fa46ae6fd4793533dfd716cfefd5ff48 | ITS1 | 1638  | ITS1F/ITS4 | 147.614  | -42.794 | Soil  | 1   | 122142 | 0.008  | Grassland | 10.9 | 615  | 5.6 | Australia  |                                |
| <i>Neostemphylium polymorphum</i>   | fa47fed73cc46aef4f127e173148607d | ITS1 | 4773  | ITS1F/ITS4 | 147.614  | -42.794 | Soil  | 121 | 156717 | 0.772  | Grassland | 10.9 | 615  | 5.5 | Australia  |                                |
| <i>Neostemphylium</i> sp. ITS1-ENV1 | dd1c7e5445d507dbcc01222aa8fb97a9 | ITS1 | 12087 | ITS1F/ITS2 | -157.663 | 21.316  | Shoot | 1   | 21408  | 0.046  | Forest    | 24.2 | 941  | NA  | USA, Hawai | <i>Ipomoea</i> sp.             |
| <i>Neostemphylium</i> sp. ITS1-ENV1 | 82ef96468f71d5ba4d5eede1a0cc0308 | ITS1 | 1     | ITS1F/ITS4 | 138.659  | -35.085 | Soil  | 1   | 176544 | 0.005  | Woodland  | 14.2 | 863  | 5.7 | Australia  |                                |
| <i>Neostemphylium</i> sp. ITS1-ENV1 | c016dc388bf8edbd076a92b0bc4b568c | ITS1 | 2446  | ITS1F/ITS4 | 138.659  | -35.085 | Soil  | 1   | 315470 | 0.003  | Woodland  | 14.2 | 863  | 5.7 | Australia  |                                |
| <i>Neostemphylium</i> sp. ITS1-ENV1 | 14f2ed49b592cb3073b8143d503ac537 | ITS1 | 2446  | ITS1F/ITS4 | 138.659  | -35.085 | Soil  | 1   | 315470 | 0.003  | Woodland  | 14.2 | 863  | 5.7 | Australia  |                                |
| <i>Paradendryphiella salina</i>     | 687b9e04de610c10568b7b873ad7115e | ITS1 | 16993 | ITS1F/ITS2 | -155.931 | 19.6152 | Shoot | 10  | 4924   | 2.030  | Forest    | 20.6 | 777  | NA  | USA, Hawai | <i>Nestegis sandwicensis</i>   |
| <i>Paradendryphiella salina</i>     | 84677b6a207aa08c9332a37d2f9f8933 | ITS1 | 3527  | ITS1F/ITS2 | -155.282 | 19.6817 | Shoot | 205 | 20109  | 10.19  | Forest    | 17.4 | 3085 | NA  | USA, Hawai | <i>Metrosideros polymorpha</i> |

|                                  |                                   |      |       |            |          |         |       |      |        |         |           |      |       |      |            |                                                      |
|----------------------------------|-----------------------------------|------|-------|------------|----------|---------|-------|------|--------|---------|-----------|------|-------|------|------------|------------------------------------------------------|
| <i>Paradendryphiella salina</i>  | dbf67b714f61957681c87be08c228fa3  | ITS1 | 3527  | ITS1F/ITS2 | -155.282 | 19.6817 | Shoot | 205  | 20109  | 10.19   | Forest    | 17.4 | 3085  | NA   | USA. Hawai | <i>Metrosideros polymorpha</i>                       |
| <i>Paradendryphiella salina</i>  | ee1d75cd640f2f5799fc8f6c54b02c3c  | ITS1 | 15717 | ITS1F/ITS2 | -155.268 | 19.6875 | Shoot | 67   | 17385  | 3.853   | Forest    | 17.7 | 3126  | NA   | USA. Hawai | <i>Vaccinium reticulatum</i>                         |
| <i>Pyrenophora seminiperda</i>   | 8f68ba966709670a93d593d3764055a6  | ITS1 | 2585  | ITS1F/ITS4 | 138.685  | -34.754 | Soil  | 4    | 72627  | 0.0055  | Woodland  | 15.9 | 573   | 8.3  | Australia  |                                                      |
| <i>Pyrenophora seminiperda</i>   | 1feb4971d0a494ae8b100fd166b857ff  | ITS1 | 9312  | ITS1F/ITS4 | 137.957  | -32.303 | Soil  | 2    | 58549  | 0.0034  | Shrubland | NA   | NA    | 8    | Australia  |                                                      |
| <i>Pyrenophora seminiperda</i>   | 6b699e4e90e7fa151cbefb5678c486ed  | ITS1 | 2585  | ITS1F/ITS4 | 138.685  | -34.754 | Soil  | 2    | 72627  | 0.0028  | Woodland  | NA   | NA    | 8.3  | Australia  |                                                      |
| <i>Pyrenophora seminiperda</i>   | 6d9ce6c910a8a3a085c326cc316b792e  | ITS1 | 7850  | ITS1F/ITS4 | 138.707  | -34.657 | Soil  | 1    | 129986 | 0.0008  | Woodland  | NA   | NA    | 7.5  | Australia  |                                                      |
| <i>Pyrenophora seminiperda</i>   | 74d3099f9f1da65c82b1903ee27330bd  | ITS1 | 13136 | ITS1F/ITS2 | 143.144  | -37.315 | Soil  | 1    | 79861  | 0.0013  | Cropland  | NA   | 587.9 | 7.2  | Australia  | <i>Vitis vinifera</i>                                |
| <i>Pyrenophora seminiperda</i>   | 7d51963aab8a458308c09713f44d1708  | ITS1 | 3553  | ITS1F/ITS4 | 138.782  | -34.617 | Soil  | 2    | 98422  | 0.0020  | Woodland  | NA   | NA    | 7.1  | Australia  |                                                      |
| <i>Pyrenophora seminiperda</i>   | 8bed6aed0ab80ead7f7f79d65df7e906  | ITS1 | 3553  | ITS1F/ITS4 | 138.782  | -34.617 | Soil  | 2    | 98422  | 0.0020  | Woodland  | 16   | 504   | 7.1  | Australia  |                                                      |
| <i>Pyrenophora seminiperda</i>   | 94409695961e692a0465c3eb30bd38a4  | ITS1 | 16120 | ITS1F/ITS2 | -105.644 | 40.0516 | Soil  | 1    | 4537   | 0.0220  | Tundra    | -3.7 | 757   | 4.16 | USA        |                                                      |
| <i>Pyrenophora seminiperda</i>   | c8daee186ebb8efab776b0cc985498be  | ITS1 | 3553  | ITS1F/ITS4 | 138.782  | -34.617 | Soil  | 2    | 98422  | 0.0020  | Woodland  | 16   | 504   | 7.1  | Australia  |                                                      |
| <i>Pyrenophora seminiperda</i>   | fef60f5ac4431e0b052ad57134616dd3  | ITS1 | 175   | ITS1F/ITS4 | 138.783  | -34.620 | Soil  | 2    | 41197  | 0.0049  | Woodland  | 16   | 504   | 7.2  | Australia  |                                                      |
| <i>Scleromyces</i> sp. ITS1-ENV2 | f4eda6a824d78112dfabe6c7baccb029  | ITS1 | 3972  | ITS1F/ITS4 | 138.163  | -35.655 | Soil  | 2    | 155747 | 0.01284 | Woodland  | 15   | 681   | 5.8  | Australia  |                                                      |
| <i>Scleromyces</i> sp. ITS1-ENV3 | 266ec1268ce5b36dd29748b49f3934f2  | ITS1 | 2065  | ITS1F/ITS2 | 115.107  | -30.258 | Soil  | 4    | 75780  | 0.0527  | Shrubland | 19.9 | 581   | 7.03 | Australia  |                                                      |
| <i>Scleromyces</i> sp. ITS1-ENV3 | ea68c692f58283a97a7bbfbfd702a3438 | ITS1 | 2532  | ITS1F/ITS2 | 115.074  | -30.191 | Soil  | 2    | 64017  | 0.031   | Shrubland | 20.2 | 557   | 6.55 | Australia  |                                                      |
| <i>Stemphylium lycopersici</i>   | 066a94da068657a4a2af4e0e77e0fcfa  | ITS1 | 13126 | ITS1F/ITS2 | -155.251 | 19.4116 | Shoot | 1    | 14991  | 0.066   | Forest    | 17.9 | 2422  | NA   | USA. Hawai | <i>Myrsine umbellata</i>                             |
| <i>Stemphylium lycopersici</i>   | 0fb500d068e8c60dd99fd13d297116fd  | ITS1 | 17317 | ITS1F/ITS2 | -158.207 | 21.5814 | Shoot | 3275 | 8316   | 285.594 | Forest    | 24.6 | 1193  | NA   | USA. Hawai | <i>Ipomoea pes-caprae</i> subsp. <i>brasiliensis</i> |
| <i>Stemphylium lycopersici</i>   | 18e228398da1c805a828ecfc18afb583  | ITS1 | 26289 | ITS1F/ITS2 | -158.207 | 21.5814 | Shoot | 9131 | 14681  | 621.96  | Forest    | 24.6 | 1193  | NA   | USA. Hawai | <i>Scaevola taccada</i>                              |
| <i>Stemphylium lycopersici</i>   | 2e33db056dc147d747e7903fdb1fce28  | ITS1 | 30302 | ITS1F/ITS2 | -159.411 | 21.8915 | Shoot | 837  | 2561   | 326.825 | Forest    | 24.5 | 1795  | NA   | USA. Hawai | <i>Ipomoea pes-caprae</i>                            |
| <i>Stemphylium lycopersici</i>   | 4835e53f51c058cda84f62ebb26777a0  | ITS1 | 12667 | ITS1F/ITS2 | -157.662 | 21.2919 | Shoot | 7200 | 11139  | 646.376 | Forest    | 24.6 | 869   | NA   | USA. Hawai | <i>Sesbania tomentosa</i>                            |

|                                |                                       |      |        |                                  |          |         |       |       |        |                 |                   |      |      |    |             |                                       |
|--------------------------------|---------------------------------------|------|--------|----------------------------------|----------|---------|-------|-------|--------|-----------------|-------------------|------|------|----|-------------|---------------------------------------|
| <i>Stemphylium lycopersici</i> | 6979bd07182d91630c3c7f39c<br>b75c041  | ITS1 | 30302  | ITS1F/ITS2                       | -159.411 | 21.8915 | Shoot | 837   | 2561   | 326.825         | Forest            | 24.5 | 1795 | NA | USA. Hawai  | <i>Ipomoea pes-caprae</i>             |
| <i>Stemphylium lycopersici</i> | 71d0b2994504b79b69b680956<br>9d8d7c1  | ITS1 | 13710  | ITS1F/ITS2                       | -157.662 | 21.2015 | Shoot | 14582 | 24908  | 585.434         | Forest            | 24.6 | 720  | NA | USA. Hawai  | <i>Scaevola taccada</i>               |
| <i>Stemphylium lycopersici</i> | 724ed29bd2026dff776c8b266<br>ab099cd  | ITS1 | 26289  | ITS1F/ITS2                       | -158.207 | 21.5814 | Shoot | 9131  | 14681  | 621.960         | Forest            | 24.6 | 1193 | NA | USA. Hawai  | <i>Scaevola taccada</i>               |
| <i>Stemphylium lycopersici</i> | 7a9cd6851703a9ddecc9cac91<br>30b43bb  | ITS1 | 26289  | ITS1F/ITS2                       | -158.207 | 21.5814 | Shoot | 9131  | 14681  | 621.960         | Forest            | 24.6 | 1193 | NA | USA. Hawai  | <i>Scaevola taccada</i>               |
| <i>Stemphylium lycopersici</i> | 7c67cdcc5afaa190ba0fd2190d<br>dc8652  | ITS1 | 12667  | ITS1F/ITS2                       | -157.662 | 21.2919 | Shoot | 7200  | 11139  | 646.376         | Forest            | 24.6 | 869  | NA | USA. Hawai  | <i>Sesbania tomentosa</i>             |
| <i>Stemphylium lycopersici</i> | 7e380924d83cda6f6bd999af6<br>1298853  | ITS1 | 226289 | ITS1F/ITS2                       | -158.207 | 21.5814 | Shoot | 9131  | 14681  | 621.960         | Forest            | 24.6 | 1193 | NA | USA. Hawai  | <i>Scaevola taccada</i>               |
| <i>Stemphylium lycopersici</i> | 8e65316434ecabf8729a020903<br>048972  | ITS1 | 30302  | ITS1F/ITS2                       | -159.411 | 21.8915 | Shoot | 837   | 2561   | 326.825         | Forest            | 24.5 | 1795 | NA | USA. Hawai  | <i>Ipomoea pes-caprae</i>             |
| <i>Stemphylium lycopersici</i> | 9f431ed2736bb036a8f4d4c53c<br>406b19  | ITS1 | 12667  | ITS1F/ITS2                       | -157.662 | 21.2919 | Shoot | 7200  | 11139  | 646.376         | Forest            | 24.6 | 869  | NA | USA. Hawai  | <i>Sesbania tomentosa</i>             |
| <i>Stemphylium lycopersici</i> | af6e7a0137959b378f0b6caf4f9<br>c7b1a  | ITS1 | 12667  | ITS1F/ITS2                       | -157.662 | 21.2919 | Shoot | 7200  | 11139  | 646.376         | Forest            | 24.6 | 869  | NA | USA. Hawai  | <i>Sesbania tomentosa</i>             |
| <i>Stemphylium lycopersici</i> | b5b6c72394fe1415c315d7a093<br>388391  | ITS1 | 12087  | ITS1F/ITS2                       | -157.663 | 21.3160 | Shoot | 9784  | 21408  | 457.025         | Forest            | 24.2 | 941  | NA | USA. Hawai  | <i>Ipomoea sp.</i>                    |
| <i>Stemphylium lycopersici</i> | bc6eaff9b9fbc9af61a187a2da<br>2922b4  | ITS1 | 30302  | ITS1F/ITS2                       | -159.411 | 21.8915 | Shoot | 837   | 2561   | 326.825         | Forest            | 24.5 | 1795 | NA | USA. Hawai  | <i>Ipomoea pes-caprae</i>             |
| <i>Stemphylium lycopersici</i> | bfbfb9cc220edab7f7f7461d7a<br>823023  | ITS1 | 12667  | ITS1F/ITS2                       | -157.662 | 21.2919 | Shoot | 7200  | 11139  | 646.376         | Forest            | 24.6 | 869  | NA | USA. Hawai  | <i>Sesbania tomentosa</i>             |
| <i>Stemphylium vesicarium</i>  | 492ed98af71918dd28dc97302<br>03e8dcf  | ITS1 | 492    | ITS1F/ITS2                       | 126.955  | 37.4653 | Dust  | 12    | 87392  | 0.13            | Anthropo<br>genic | 12   | 1383 | NA | South Korea |                                       |
| <i>Stemphylium vesicarium</i>  | 84677b6a207aa08c9332a37d2f<br>9f8933  | ITS1 | 4352   | ITS1F/ITS2                       | -155.282 | 19.6817 | Shoot | 205   | 20109  | 10.19           | Forest            | 17.4 | 3085 | NA | USA. Hawai  | <i>Metrosideros<br/>polymorpha</i>    |
| <i>Stemphylium vesicarium</i>  | dbff67b714f61957681c87be08c<br>228fa3 | ITS1 | 4352   | ITS1F/ITS2                       | -155.282 | 19.6817 | Shoot | 205   | 20109  | 10.19           | Forest            | 17.4 | 3085 | NA | USA. Hawai  | <i>Metrosideros<br/>polymorpha</i>    |
| <i>Stemphylium vesicarium</i>  | ed3318e54295c1c4c2ae7e737c<br>52aa60  | ITS1 | 1350   | ITS1F_KYO1/ITS2_KYO1             | -72.18   | -40.65  | Shoot | 10283 | 209289 | 49.13           | Forest            | 10.2 | 1403 | NA | Chile       | <i>Amomyrtus luma</i>                 |
| <i>Alternaria avenicola</i>    | e6c1a3819c358547e43bf6e62a<br>e0a52c  | ITS2 | 6552   | gITS7/ITS4                       | 25.2214  | 60.7475 | Shoot | 4     | 148907 | 0.02686<br>2404 | Forest            | 4.8  | 621  | NA | Finland     | <i>Picea abies</i>                    |
| <i>Alternaria avenicola</i>    | 3c8b5a02fbbcb687601ff0960cf2<br>e678a | ITS2 | 504    | ITS_S2F + ITS3<br>mixed 1:1/ITS4 | 24.6624  | 60.2378 | Air   | 137   | 118208 | 1.15897<br>4012 | Forest            | 5.5  | 635  | NA | Finland     |                                       |
| <i>Alternaria avenicola</i>    | 23749aa1bcadccae908868a7c4<br>521df1  | ITS2 | 875    | ITS3/ITS4                        | -121.916 | 52.315  | Soil  | 4     | 397148 | 0.01007<br>1812 | Forest            | 4.4  | 565  | NA | Canada      | <i>Picea engelmannii x<br/>glauca</i> |
| <i>Alternaria avenicola</i>    | 5236f208fd10be5d961b16087<br>16e0457  | ITS2 | 504    | ITS_S2F + ITS3<br>mixed 1:1/ITS4 | 24.6624  | 60.2378 | Air   | 137   | 118208 | 1.15897<br>4012 | Forest            | 5.5  | 635  | NA | Finland     |                                       |

|                                   |                                  |      |       |                               |          |         |                  |     |        |             |               |      |      |      |           |                               |
|-----------------------------------|----------------------------------|------|-------|-------------------------------|----------|---------|------------------|-----|--------|-------------|---------------|------|------|------|-----------|-------------------------------|
| <i>Alternaria avenicola</i>       | ff7d6ca58c83d23c17241f382a4234cf | ITS2 | 504   | ITS_S2F + ITS3 mixed 1:1/ITS4 | 24.6624  | 60.2378 | Air              | 137 | 118208 | 1.158974012 | Forest        | 5.5  | 635  | NA   | Finland   |                               |
| <i>Alternaria avenicola</i>       | a5a850653b6a9d5be42d69160182aba4 | ITS2 | 7300  | ITS_S2F + ITS3 mixed 1:1/ITS4 | 29.893   | 62.6343 | Air              | 35  | 52210  | 0.670369661 | Anthropogenic | 3.3  | 594  | NA   | Finland   |                               |
| <i>Alternaria avenicola</i>       | 2db75a55c5b1c1171c2d2e400c626d91 | ITS2 | 4370  | ITS_S2F + ITS3 mixed 1:1/ITS4 | 30.1733  | 62.6131 | Air              | 47  | 92082  | 0.51041463  | Forest        | 2.5  | 731  | NA   | Finland   |                               |
| <i>Alternaria avenicola</i>       | c6a251dfd5659973dc196dfc0b9a80a2 | ITS2 | 358   | ITS_S2F + ITS3 mixed 1:1/ITS4 | 23.7617  | 61.4997 | Air              | 127 | 144059 | 0.88158324  | Anthropogenic | 4.4  | 619  | NA   | Finland   |                               |
| <i>Neostemphylium polymorphum</i> | 1d0cffb55ac621d9de77f5c45600d6ba | ITS2 | 4773  | ITS1F/ITS4                    | 147.614  | -42.279 | Soil             | 2   | 156717 | 0.0127      | Grassland     | 10.9 | 615  | 5.5  | Australia |                               |
| <i>Neostemphylium polymorphum</i> | 58042f86d5ec0f8c17915130192fa283 | ITS2 | 16963 | 5.8S_Fun/ITS4_Fun             | 2.95     | 45.77   | Air              | 2   | 22821  | 0.087       | Grassland     | 6.9  | 1214 | NA   | France    |                               |
| <i>Neostemphylium polymorphum</i> | 66b6a8c0cadfbd99ada97bdb3b24678b | ITS2 | 4773  | ITS1F/ITS4                    | 147.614  | -42.279 | Soil             | 1   | 156717 | 0.0063      | Grassland     | 10.9 | 615  | 5.5  | Australia |                               |
| <i>Neostemphylium polymorphum</i> | 87e8163b46c22ddb7d63dddc9aa3ec31 | ITS2 | 4773  | ITS1F/ITS4                    | 147.614  | -42.279 | Soil             | 29  | 156717 | 0.1850      | Grassland     | 10.9 | 615  | 5.5  | Australia |                               |
| <i>Neostemphylium polymorphum</i> | 967cf79dc9ad99998975be9c8c882b60 | ITS2 | 4773  | ITS1F/ITS4                    | 147.614  | -42.279 | Soil             | 35  | 156717 | 0.2233      | Grassland     | 10.9 | 615  | 5.5  | Australia |                               |
| <i>Neostemphylium polymorphum</i> | aa0d5ccd7a43d4783d0f728ca1a357e1 | ITS2 | 16963 | 5.8S_Fun/ITS4_Fun             | 2.95     | 45.77   | Air              | 4   | 22821  | 0.1752      | Grassland     | 6.9  | 1214 | NA   | France    |                               |
| <i>Neostemphylium polymorphum</i> | b0447c80056dc125a72c960af9a17a63 | ITS2 | 4773  | ITS1F/ITS4                    | 147.614  | -42.279 | Soil             | 1   | 156717 | 0.0063      | Grassland     | 10.9 | 615  | 5.5  | Australia |                               |
| <i>Neostemphylium polymorphum</i> | cad286512c25efa342c6474fc4db7956 | ITS2 | 4773  | ITS1F/ITS4                    | 147.614  | -42.279 | Soil             | 29  | 156717 | 0.1850      | Grassland     | 10.9 | 615  | 5.5  | Australia |                               |
| <i>Pyrenophora seminiperda</i>    | 34d8bd9bdf3662372c839eb02d204be8 | ITS2 | 2846  | Fits7/ITS4                    | -112.552 | 37.1134 | Soil             | 648 | 98745  | 6.5623      | Shrubland     | 12.3 | 265  | 8.44 | USA       |                               |
| <i>Pyrenophora seminiperda</i>    | 4f65387693d7a71a603a1f3c8f908f35 | ITS2 | 2924  | ITS86F/ITS4                   | -2.97938 | 37.081  | Rhizosphere soil | 898 | 165454 | 5.42749042  | Shrubland     | 5.9  | 551  | 5.83 | Spain     | <i>Thymus zygis</i>           |
| <i>Pyrenophora seminiperda</i>    | 0a1137944cec67aa407959730f6a3ae5 | ITS2 | 20849 | ITS7o/ITS4                    | -112.523 | 36.625  | Root             | 79  | 19916  | 3.966659972 | Shrubland     | 11.9 | 349  | NA   | USA       | <i>Achnatherum hymenoides</i> |
| <i>Pyrenophora seminiperda</i>    | 6330ed88ce72d7988d5e0eab985ec917 | ITS2 | 4839  | ITS86F/ITS4                   | -29.7962 | 37.0816 | Soil             | 285 | 126643 | 2.250420473 | Shrubland     | 5.9  | 551  | 6.21 | Spain     | <i>Thymus zygis</i>           |
| <i>Pyrenophora seminiperda</i>    | 4dae324039de11d95d6b5517fba893c9 | ITS2 | 2924  | ITS86F/ITS4                   | -29.7938 | 37.081  | Rhizosphere soil | 898 | 165454 | 5.42749042  | Shrubland     | 5.9  | 551  | 5.83 | Spain     | <i>Thymus zygis</i>           |
| <i>Pyrenophora seminiperda</i>    | 34d8bd9bdf3662372c839eb02d204be8 | ITS2 | 2846  | fITS7/ITS4                    | -112.552 | 37.1134 | Soil             | 648 | 98745  | 6.562357588 | Shrubland     | 12.3 | 265  | 8.44 | USA       |                               |
| <i>Pyrenophora seminiperda</i>    | b1a64842f68814bee91d97dd1e65f4be | ITS2 | 12135 | ITS7o/ITS4                    | -112.523 | 36.625  | Rhizosphere soil | 68  | 25765  | 2.639239278 | Shrubland     | 11.9 | 349  | NA   | USA       | <i>Bromus tectorum</i>        |

|                                  |                                  |      |       |                   |          |         |                  |     |        |             |           |      |     |      |                |                              |
|----------------------------------|----------------------------------|------|-------|-------------------|----------|---------|------------------|-----|--------|-------------|-----------|------|-----|------|----------------|------------------------------|
| <i>Pyrenophora seminiperda</i>   | a81ce44ad32be41fb9a5c8c5fd5a8eec | ITS2 | 14958 | ITS7o/ITS4        | -112.523 | 36.625  | Root             | 32  | 28169  | 1.136000568 | Shrubland | 11.9 | 349 | NA   | USA            | <i>Bromus tectorum</i>       |
| <i>Pyrenophora seminiperda</i>   | 5604ab565654129169f144c39537f0f6 | ITS2 | 2924  | ITS86F/ITS4       | -2.97938 | 37.081  | Rhizosphere soil | 898 | 165454 | 5.42749042  | Shrubland | 5.9  | 551 | 5.83 | Spain          | <i>Thymus zygis</i>          |
| <i>Pyrenophora seminiperda</i>   | 502bd02790472cee57bb4b47d586c3a4 | ITS2 | 2924  | ITS86F/ITS4       | -2.97938 | 37.081  | Rhizosphere soil | 898 | 165454 | 5.42749042  | Shrubland | 5.9  | 551 | 5.83 | Spain          | <i>Thymus zygis</i>          |
| <i>Scleromyces submersus</i>     | 2d973fbe9f0d95ebbc81d928215738d4 | ITS2 | 3019  | ITS1/ITS4         | 138.727  | -34.933 | Soil             | 20  | 129610 | 0.1543      | Woodland  | 13.5 | 938 | 5.4  | Australia      |                              |
| <i>Scleromyces</i> sp. ITS2-ENV1 | 05131d3b383aaa1ba73a69bc6a7ffdf4 | ITS2 | 8507  | ITS9/ITS4         | -121.639 | 39.4532 | Root             | 2   | 193875 | 0.0103      | Aquatic   | 18   | 702 | NA   | USA            | <i>Lilaea scilloides</i>     |
| <i>Scleromyces</i> sp. ITS2-ENV1 | 1f21676d35ceed7c84e8efbc10653dc6 | ITS2 | 12244 | ITS9/ITS4         | -121.629 | 39.5153 | Shoot            | 1   | 7333   | 0.1363      | Aquatic   | 17.9 | 799 | NA   | USA            | <i>Najas guadalupensis</i>   |
| <i>Scleromyces</i> sp. ITS2-ENV1 | 2f7eb730070aaa21b9567fea4badb5fb | ITS2 | 8507  | ITS9/ITS4         | -121.639 | 39.4532 | Root             | 2   | 193875 | 0.0103      | Aquatic   | 18   | 702 | NA   | USA            | <i>Lilaea scilloides</i>     |
| <i>Scleromyces</i> sp. ITS2-ENV1 | 4b24f86b45d28909fb24ff9233ba6498 | ITS2 | 8507  | ITS9/ITS4         | -121.639 | 39.4532 | Root             | 2   | 193875 | 0.0103      | Aquatic   | 18   | 702 | NA   | USA            | <i>Lilaea scilloides</i>     |
| <i>Scleromyces</i> sp. ITS2-ENV1 | 597ac7d83b3c6f1a5f35918e021f1366 | ITS2 | 18027 | ITS9/ITS4         | -121.629 | 39.5153 | Shoot            | 22  | 18189  | 1.2095      | Aquatic   | 17.9 | 799 | NA   | USA            | <i>Potamogeton</i>           |
| <i>Scleromyces</i> sp. ITS2-ENV1 | 6e25c9dddb6bcc05a7f858a6b5db5ae  | ITS2 | 4446  | ITS9/ITS4         | -121.629 | 39.5153 | Shoot            | 2   | 6324   | 0.3162      | Aquatic   | 17.9 | 799 | NA   | USA            | <i>Potamogeton</i>           |
| <i>Scleromyces</i> sp. ITS2-ENV1 | 79ed1e9a54df669435f5285e7f9a8ae5 | ITS2 | 8507  | ITS9/ITS4         | -121.639 | 39.4532 | Root             | 2   | 193875 | 0.0103      | Aquatic   | 18   | 702 | NA   | USA            | <i>Lilaea scilloides</i>     |
| <i>Scleromyces</i> sp. ITS2-ENV1 | 8fd4e6fb95f61cf85968364bbf094eeb | ITS2 | 8507  | ITS9/ITS4         | -121.639 | 39.4532 | Root             | 2   | 193875 | 0.0103      | Aquatic   | 18   | 702 | NA   | USA            | <i>Lilaea scilloides</i>     |
| <i>Scleromyces</i> sp. ITS2-ENV1 | b24de2e10386ebb855cd45fdf54547bb | ITS2 | 4446  | ITS9/ITS4         | -121.629 | 39.5153 | Shoot            | 1   | 6324   | 0.1581      | Aquatic   | 17.9 | 799 | NA   | USA            | <i>Potamogeton</i>           |
| <i>Scleromyces</i> sp. ITS2-ENV1 | c3698cd312b026411f3b96f4e25116c5 | ITS2 | 4446  | ITS9/ITS4         | -121.629 | 39.5153 | Shoot            | 1   | 6324   | 0.1581      | Aquatic   | 17.9 | 799 | NA   | USA            | <i>Potamogeton</i>           |
| <i>Scleromyces</i> sp. ITS2-ENV1 | c99809a0b12c3b35ea5f8ec085c30a9b | ITS2 | 8507  | ITS9/ITS4         | -121.639 | 39.4532 | Root             | 2   | 193875 | 0.0103      | Aquatic   | 18   | 702 | NA   | USA            | <i>Lilaea scilloides</i>     |
| <i>Scleromyces</i> sp. ITS2-ENV1 | c9da1c75383e07ae0f29cb7ebd34d6ec | ITS2 | 8507  | ITS9/ITS4         | -121.639 | 39.4532 | Root             | 2   | 193875 | 0.0103      | Aquatic   | 18   | 702 | NA   | USA            | <i>Lilaea scilloides</i>     |
| <i>Scleromyces</i> sp. ITS2-ENV1 | d6383b786a2c973a11a4cdc9d5b1ae20 | ITS2 | 18027 | ITS9/ITS4         | -121.629 | 39.5153 | Shoot            | 2   | 18189  | 0.1099      | Aquatic   | 17.9 | 799 | NA   | USA            | <i>Potamogeton</i>           |
| <i>Scleromyces</i> sp. ITS2-ENV1 | f55ed07fed4032f35404f6db08d712de | ITS2 | 8507  | ITS9/ITS4         | -121.639 | 39.4532 | Root             | 2   | 193875 | 0.0103      | Aquatic   | 18   | 702 | NA   | USA            | <i>Lilaea scilloides</i>     |
| <i>Scleromyces</i> sp. ITS2-ENV1 | ff741397fc8be27effa06612142e6d21 | ITS2 | 8507  | ITS9/ITS4         | -121.639 | 39.4532 | Root             | 3   | 193875 | 0.0154      | Aquatic   | 18   | 702 | NA   | USA            | <i>Lilaea scilloides</i>     |
| <i>Stemphylium lycopersici</i>   | 5b0276f3fffc98d811ce70855844960f | ITS2 | 16825 | ITS3ngs10/ITS4ngs | -5.66    | -15.94  | Soil             | 75  | 41513  | 1.806       | Woodland  | 19.3 | 888 | 5.13 | UK. St. Helena | <i>Commidendrum robustum</i> |

|                                |                                  |      |       |                   |          |         |                           |     |        |        |           |      |      |      |                |                                 |
|--------------------------------|----------------------------------|------|-------|-------------------|----------|---------|---------------------------|-----|--------|--------|-----------|------|------|------|----------------|---------------------------------|
| <i>Stemphylium lycopersici</i> | 6120a99178a8b20be667f161838732be | ITS2 | 6378  | fITS7/ITS4        | 114.65   | 22.57   | Shoot                     | 208 | 106412 | 1.9546 | Shrubland | 23.2 | 1929 | NA   | China          | <i>Mussaenda kwangtungensis</i> |
| <i>Stemphylium lycopersici</i> | bac41123745959ccb38a31220ca5d676 | ITS2 | 14779 | ITS3ngs10/ITS4ngs | -5.66    | -15.94  | Soil                      | 9   | 33323  | 0.2700 | Woodland  | 19.3 | 888  | 5.58 | UK. St. Helena | <i>Commidendrum robustum</i>    |
| <i>Stemphylium lycopersici</i> | cd4d40a0ef355f976209101ee0379a70 | ITS2 | 6384  | fITS7/ITS4        | 114.65   | 22.57   | Shoot                     | 47  | 101043 | 0.4651 | Shrubland | 23.2 | 1929 | NA   | China          | <i>Mussaenda kwangtungensis</i> |
| <i>Stemphylium lycopersici</i> | fcc7eac996d571f7843d9edd7ad60ca3 | ITS2 | 19864 | ITS3ngs10/ITS4ngs | -5.66    | -15.946 | Soil                      | 129 | 18609  | 6.9321 | Woodlad   | 19.3 | 888  | 4.26 | UK. St. Helena | <i>Commidendrum robustum</i>    |
| <i>Stemphylium vesicarium</i>  | 0f7ad62712c422213b54f8eb22b16bf0 | ITS2 | 2866  | ITS2F/ITS2R       | -71.13   | -34.37  | Shoot                     | 4   | 80863  | 0.0494 | Cropland  | 16.4 | 507  | NA   | Chile          | <i>Vitis vinifera</i>           |
| <i>Stemphylium vesicarium</i>  | 1f40a73ffcd46ae42a78ca91b1eef985 | ITS2 | 21716 | ITS2F/ITS2R       | -71.4    | -34.5   | Shoot                     | 5   | 27753  | 0.1801 | Cropland  | 16.2 | 640  | NA   | Chile          | <i>Vitis vinifera</i>           |
| <i>Stemphylium vesicarium</i>  | 2c37ecf51d498309408e001b3faf688e | ITS2 | 1599  | Fits9its4         | 19.3714  | 42.565  | Root and Rhizosphere soil | 2   | 40096  | 0.4988 | Grassland | 11.7 | 1839 | 8.06 | Montenegro     | <i>Lactuca serriola</i>         |
| <i>Stemphylium vesicarium</i>  | 3237eb929429f4c1f1e9b7d71419eba1 | ITS2 | 4363  | ITS2F/ITS2R       | -71.4    | -34.5   | Shoot                     | 10  | 63473  | 0.1575 | Cropland  | 16.2 | 640  | NA   | Chile          | <i>Vitis vinifera</i>           |
| <i>Stemphylium vesicarium</i>  | 383cea421e6f763f3015359d40e11862 | ITS2 | 21716 | ITS2F/ITS2R       | -71.4    | -34.5   | Shoot                     | 3   | 27753  | 0.1080 | Cropland  | 16.2 | 640  | NA   | Chile          | <i>Vitis vinifera</i>           |
| <i>Stemphylium vesicarium</i>  | 4687f1ae920a25ad43e08de3939eb73d | ITS2 | 4363  | ITS2F/ITS2R       | -71.4    | -34.5   | Shoot                     | 18  | 63473  | 0.2835 | Cropland  | 16.2 | 640  | NA   | Chile          | <i>Vitis vinifera</i>           |
| <i>Stemphylium vesicarium</i>  | 4e36b68177bc8ad38d07e558e5b04763 | ITS2 | 14035 | ITS2/ITS2R        | -71.4    | -34.5   | Shoot                     | 6   | 34777  | 0.1725 | Cropland  | 16.2 | 640  | NA   | Chile          | <i>Vitis vinifera</i>           |
| <i>Stemphylium vesicarium</i>  | 4f4deae930db659a8aed2d42b777a0b2 | ITS2 | 13551 | ITS2/ITS2R        | -71.16   | -34.36  | Shoot                     | 10  | 72254  | 0.1384 | Cropland  | 15.2 | 681  | NA   | Chile          | <i>Vitis vinifera</i>           |
| <i>Stemphylium vesicarium</i>  | 54ed190e8d9c1a7b493a136d48663954 | ITS2 | 7953  | ITS2/ITS2R        | -71.13   | -34.37  | Shoot                     | 21  | 60405  | 0.3476 | Cropland  | 16.4 | 507  | NA   | Chile          | <i>Vitis vinifera</i>           |
| <i>Stemphylium vesicarium</i>  | 6c358721ebb80bc49a4c163ded84dbbc | ITS2 | 4358  | ITS2F/ITS2R       | -71.16   | -34.36  | Shoot                     | 2   | 45733  | 0.0437 | Cropland  | 15.2 | 681  | NA   | Chile          | <i>Vitis vinifera</i>           |
| <i>Stemphylium vesicarium</i>  | 7ba789aead8ae81a73ee00cf27dbe5a6 | ITS2 | 4374  | ITS86F/ITS4       | -2.98623 | 37.0064 | Rhizosphere soil          | 1   | 182418 | 0.0054 | Shrubland | 13.2 | 446  | 8.6  | Spain          | <i>Thymus zygis</i>             |
| <i>Stemphylium vesicarium</i>  | 7d0b87c07c3622366e63b935c9987fc2 | ITS2 | 1459  | ITS86F/ITS4       | -3.35489 | 36.9241 | Soil                      | 1   | 89525  | 0.0111 | Shrubland | 13.7 | 498  | 7.12 | Spain          | <i>Thymus zygis</i>             |
| <i>Stemphylium vesicarium</i>  | 7d9f6d9f6eeba00f7497716f5fe67b9f | ITS2 | 6513  | ITS1/ITS4         | 18.7537  | -33.960 | Shoot                     | 7   | 91158  | 0.0767 | Cropland  | 16.6 | 1041 | 3.61 | South Africa   | <i>Vitis vinifera</i>           |
| <i>Stemphylium vesicarium</i>  | 8036cd356fad11976d311b25f9dff98e | ITS2 | 4378  | ITS2F/ITS2R       | -71.4    | -34.5   | Shoot                     | 3   | 68788  | 0.0436 | Cropland  | 16.2 | 640  | NA   | Chile          | <i>Vitis vinifera</i>           |
| <i>Stemphylium vesicarium</i>  | 84a599ffc5bcf99f59c6fa80e6c8f7ea | ITS2 | 7380  | ITS2F/ITS2R       | -71.4    | -34.5   | Shoot                     | 9   | 155358 | 0.0579 | Cropland  | 16.2 | 640  | NA   | Chile          | <i>Vitis vinifera</i>           |
| <i>Stemphylium vesicarium</i>  | c519b0dffcb76d8324b965099400755  | ITS2 | 7483  | ITS2F/ITS2R       | -71.3    | -34.37  | Shoot                     | 3   | 32624  | 0.0919 | Cropland  | 16.4 | 507  | NA   | Chile          | <i>Vitis vinifera</i>           |



|                               |                                  |      |      |             |          |         |                  |    |        |        |          |      |     |     |       |                        |
|-------------------------------|----------------------------------|------|------|-------------|----------|---------|------------------|----|--------|--------|----------|------|-----|-----|-------|------------------------|
| <i>Stemphylium vesicarium</i> | c9daedc52d6ac1f8373d8b8842a8a79c | ITS2 | 3285 | ITS2F/ITS2R | -71.29   | -34.3   | Shoot            | 3  | 114588 | 0.0261 | Cropland | 16.3 | 516 | NA  | Chile | <i>Vitis vinifera</i>  |
| <i>Stemphylium vesicarium</i> | e0bc266a227f65bff4d369b4020421b7 | ITS2 | 4291 | ITS1/ITS4   | -77.0919 | 43.1250 | Rhizosphere soil | 12 | 220187 | 0.0454 | Cropland | 9.1  | 917 | 6.8 | USA   | <i>Malus domestica</i> |

<sup>1</sup>Internal Transcribed Spacer region; <sup>2</sup>Number assigned to a particular environmental sample; <sup>3</sup>Abundance of a singular sequence in a particular environmental sample; <sup>4</sup>Total abundance of ITS sequences found in a particular environmental sample; <sup>5</sup>Relative abundance of a singular ITS sequence in a particular environmental sample; <sup>6</sup>Mean Annual Temperature (°C); <sup>7</sup>Mean Annual Precipitation (mm).
